# Supplementary material for: Iron overload induced death of osteoblasts in vitro: involvement of the mitochondrial apoptotic pathway
Source: PeerJ journal article supplement (doi:10.7717/peerj.2611), 2016-11-08

**A**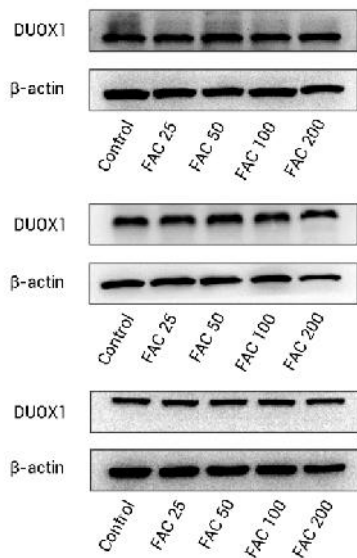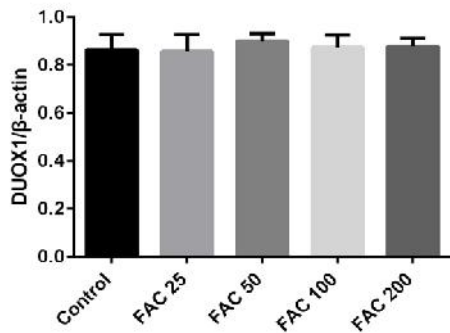**B**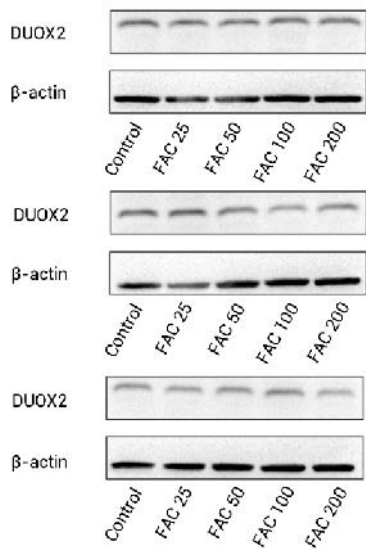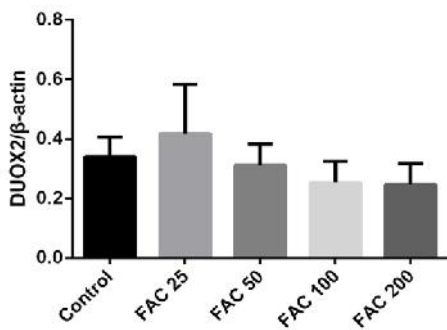

Supplement: peerj-11057_Figure_S2.pdf [file peerj-11057_Figure_S2.pdf]
